# Supplementary material for: CPEB3 Maintains Developmental Competence of the Oocyte
Source: MDPI journal article supplement (doi:10.3390/cells13100850), 2024-05-16
Supplement: s1 [file s1]

Fig. S1

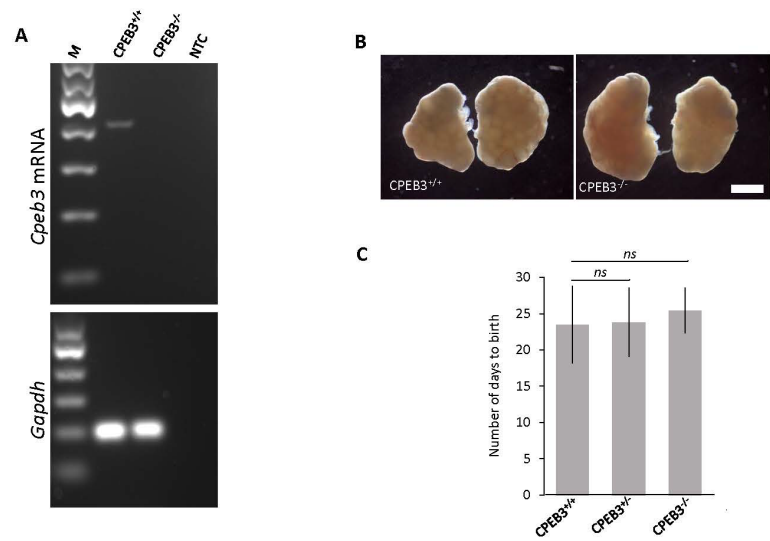

Fig. S1: *Cpeb3* mRNA expression and phenotype analysis related to absence of CPEB3. A) PCR analysis of *Cpeb3* mRNA in oocytes. B) Representative image of morphology of ovaries from specific genotypes. Scale bar, 1mm. C) Quantification of reproductive fitness of specific genotypes. Data are represented as the mean  $\pm$  SEM from at least 11 breeding couples; ns, non-significant according to one-way ANOVA.

Fig. S2

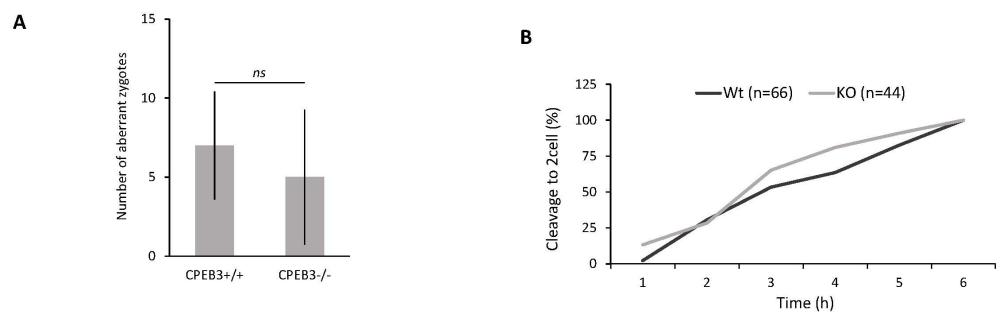

Fig. S2: Timing of first embryonic division is equal between genotypes. A) Quantification of aberrant zygotes in relation to genotype. Data are represented as the mean  $\pm$  SEM from at least eleven independent experiments; ns, non-significant, according to one-way ANOVA. B) Quantification of timing of embryo cleavage to 2cell stage. From three biological replicates with depicted numbers of embryos.

**Fig. S3**

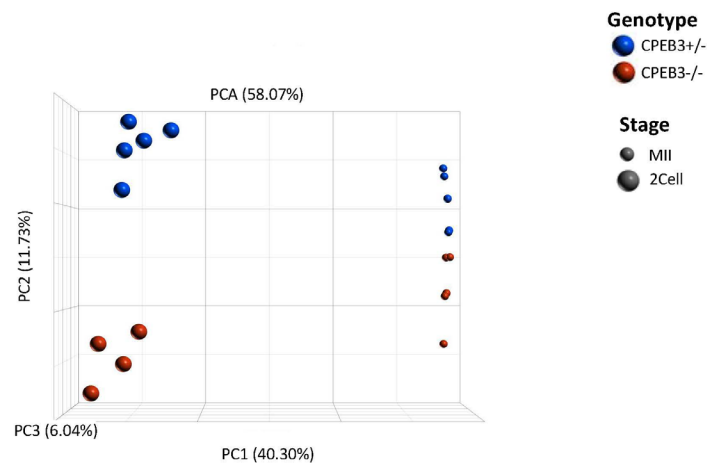

**Fig. S3. Principle component analysis of transcriptomes in MII oocytes and early 2cell embryo.**

**Fig. S4**

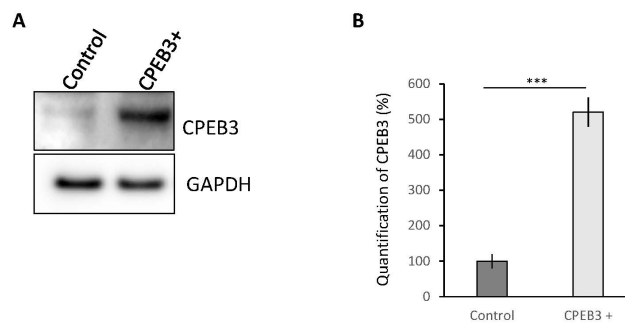

**Fig. S4: Expression of microinjected CPEB3 protein in CPEB3-deficient oocytes.** **A)** Representative Immunoblot analysis of CPEB3<sup>-/-</sup> MII oocytes microinjected with exogenous CPEB3 protein (CPEB3<sup>+</sup>) in GV stage. CPEB3<sup>-/-</sup> oocytes were used as a control. **B)** Quantification of CPEB3 protein from **A**). Data are represented as the mean  $\pm$  SEM from three independent experiments; \*\*\*  $p < 0.001$ , according to one-way ANOVA, the expression of CPEB3 protein in the buffer-injected CPEB3<sup>-/-</sup> oocytes (Control) from cKO females was set as 100%.

**Supplementary Table 1: Primers and antibodies used in the study.**

**Primers used for qRT-PCR**

| Official symbol | Forward 5'-3'             | Reverse 5'-3'               | Gene Bank ID   | Amplicon size (bp) |
|-----------------|---------------------------|-----------------------------|----------------|--------------------|
| Cnot7           | GCAGGATCTGACTCACTGCTTA    | <i>GTCTATGACTGCTTCTGGCT</i> | NM_011135.5    | 181                |
| Zscan4d         | ACTTTTATGTTTGTGTTTTATTGTG | CGAGTCTCTGACCGCCGAACCCA     | NM_001100186.1 | 134                |
| Cbfa2t3         | CCGACCGTGAGGAACCTCAAC     | CATGTAGCCAGACAGGGTCC        | NM_009824.2    | 170                |
| Obox5           | TCATGTTGGAGCCTTGGTTCTC    | TTTGATGCAAGGAGGGACC         | NM_145709.2    | 90                 |
| Spi-C           | TGGAATGTCACCACAGAGA       | CTGTACGGATTGGTGAAGC         | NM_011461.3    | 97                 |
| Hist1h1e        | TCTCTCTCACACGCTTCGC       | GGGCCTTCTTCTGACGGGT         | NM_015787.4    | 94                 |
| Eif1a           | AACAGCGCAGAGTAAAAA        | CTTATATGGCACAGCTCCT         | NM_001374654.1 | 156                |
| Zfp770          | ACAGCACCAAGAGAGAAGA       | TGGGTTGACTGTGGAAAGA         | NM_175466.5    | 157                |
| Gapdh           | TGGAGAACTGCCAAGTATG       | GGTCCTCAGTGAGCCCAAG         | XM_001476707.3 | 92                 |

**Primers used for PAT-assay**

| Official symbol | Forward 5'-3'                  | Reverse 5'-3'          | Gene Bank ID   |
|-----------------|--------------------------------|------------------------|----------------|
| Anchor primer   | -                              | GCGAGCTCCGCTTTTTTTTTTT | -              |
| Cnot7           | GACCAGAGCATGTGTTGGAAGATTTTG    | -                      | NM_011135.5    |
| Zscan4d         | CGAGTCTCTGACCGCCGAACCCA        | -                      | NM_001100186.1 |
| Cbfa2t3         | CATCTATCTGGGTGCTGGGT           | -                      | NM_009824.2    |
| Obox5           | AGTGCGATTGTTTTAAAGTC           | -                      | NM_145709.2    |
| Zfp770          | CATGTTAAATGATGTTTGC            | -                      | NM_175466.5    |
| Ccnb1           | CAAGTGCACTCTCAGTGCCCTCCACAGTGT | -                      | NM_172301.3    |

**Antibodies used for WB**

| Name (cat.#)         | Company               |
|----------------------|-----------------------|
| CPEB3 (SAB2100473)   | SigmaAldrich          |
| ZSCAN4 (ab97748)     | Abcam                 |
| SPI-C (PA5-67537)    | Invitrogen            |
| CBFA2T3 (17190-1-AP) | Protein tech          |
| H1.4 (bs-10334)      | Bioss                 |
| CNOT7 (WH0029883M1)  | SigmaAldrich          |
| GAPDH (97166)        | Cell Signalling Tech. |
| GAPDH (G9545)        | SigmaAldrich          |

**Supplementary File 1:** Gene ontology analysis showed that DE mRNAs coding mostly for genes involved in RNA expression, translation and transcription (**Fig. 5B and Supplementary File 1**) in both oocytes and embryos.
